# Supplementary material
Source: PubMed Central journal article supplement (PMC4965840)
Supplement: ja6b04325_si_001.pdf [file ja6b04325_si_001.pdf]

# Supporting Information

## Solar-driven Reduction of Aqueous Protons Coupled to Selective Alcohol Oxidation with a Carbon Nitride - Molecular Ni Catalyst System

Hatice Kasap,<sup>1</sup> Christine A. Caputo,<sup>1</sup> Benjamin C. M. Martindale,<sup>1</sup> Robert Godin,<sup>2</sup> Vincent Wing-hei Lau,<sup>3,4</sup> Bettina V. Lotsch,<sup>3,4,\*</sup> James R. Durrant,<sup>2,\*</sup> Erwin Reisner<sup>1,\*</sup>

<sup>1</sup>Christian Doppler Laboratory for Sustainable SynGas Chemistry, Department of Chemistry, University of Cambridge, Lensfield Road, Cambridge CB2 1EW, UK

<sup>2</sup>Department of Chemistry, Imperial College London, Exhibition Road, London SW7 2AZ, UK

<sup>3</sup>Max Planck Institute for Solid State Research, Heisenbergstrasse 1, 70569 Stuttgart, Germany

<sup>4</sup>Department of Chemistry, Ludwig-Maximilians-Universität München, Butenandtstrasse 5–13 (Haus D), 81377 München, Germany

Corresponding authors:

[reisner@ch.cam.ac.uk](mailto:reisner@ch.cam.ac.uk)

[j.durrant@imperial.ac.uk](mailto:j.durrant@imperial.ac.uk)

[b.lotsch@fkf.mpg.de](mailto:b.lotsch@fkf.mpg.de)

### Contents

|                                                    |          |
|----------------------------------------------------|----------|
| Analysis of Transient Absorption Spectroscopy Data | page S1  |
| Tables S1 to S8                                    | page S2  |
| Figures S1 to S24                                  | page S9  |
| References                                         | page S23 |

## Analysis of Transient Absorption Spectroscopy Data

Decays could be fit to a power law of the form  $y = y_0 + |t - t_0|^{-b}$  (Figure S20).  $t_0$  represents the time offset between the trigger signal and the arrival of the excitation pulse to the sample, while  $y_0$  is the absorbance offset at infinite times. The parameter  $b$  was ca. 0.35 and  $t_0$  was typically  $1 \times 10^{-7}$  s. No trends with respect to the concentration of 4-MBA or **NiP** were observed.

In order to quantify the concentration of long-lived species, we used the amplitude at  $3 \mu\text{s}$  to estimate the initial population of excited species, and the amplitude at 100 ms for the population of long-lived species. The yield of the long-lived species is then calculated as:

$$\Phi_{long-lived} = \frac{A_{t=100ms}}{A_{t=3\mu s}} \quad (\text{S1})$$

The calculated yields are shown in Figure S22. As mentioned in the main text, the amplitude at  $3 \mu\text{s}$  will underestimate the excited state species concentration immediately after the excitation pulse. As a result, the yields calculated from equation S1 are overestimated. Without data spanning femtoseconds to nanoseconds under similar excitation conditions, we are not able to quantify the total photogenerated excited species population. Despite the issues identified, the data clearly indicate that 4-MBA affect the transient absorption signal in the microsecond timescale while reaction with **NiP** occurs on timescales longer than 2 s.

Assuming dynamic quenching, we can estimate the bimolecular rate constant of hole transfer from  $\text{NCN}^*\text{CN}_x$  to 4-MBA ( $k_{rxn}$ ) by first writing the expression for the yield for competitive kinetics:

$$\Phi_{long-lived} = \frac{k_{form}}{k_{1/2} + k_{form}} \quad (\text{S2})$$

where  $k_{form} = k_0 + k_{rxn}[4 - MBA]$

$k_{1/2}$  is the inverse of the characteristic lifetime ( $\tau_{1/2}$ ) of the decay of  $\text{NCN}^*\text{CN}_x$  without scavengers. We then rearrange equation S2 to calculate the rate of formation ( $k_{form}$ ):

$$k_{form} = -\frac{\Phi_{long-lived} k_{1/2}}{\Phi_{long-lived} - 1} \quad (\text{S3})$$

Finally, a linear fit of the plot  $k_{form}$  vs.  $[4\text{-MBA}]$  yields  $k_{rxn}$  as the slope.

**Table S1.** Solar light driven simultaneous H<sub>2</sub> and aldehyde production with **NiP** and <sup>13</sup>C<sub>3</sub>N<sub>2</sub>. Experiments were performed using <sup>13</sup>C<sub>3</sub>N<sub>2</sub> (5 mg) in aqueous potassium phosphate buffer (KPi) at pH 4.5 (0.02 M) containing 4-methyl benzyl alcohol (4-MBA) and **NiP** as a hydrogen evolution catalyst. All the photocatalytic experiments were carried out under N<sub>2</sub> containing 2% CH<sub>4</sub>, the vials were irradiated with simulated solar light (AM 1.5G) in water-jacketed rack at 25°C. Total solvent volume was 3 mL with a headspace volume of 4.74 ml. Entry **9** displays the optimized conditions. All the experiments showed 100% selectivity towards aldehyde formation and no carboxylic acid was detected.

| Entry                              | NiP / nmol | Alcohol/ $\mu$ mol | pH of the solution | Aldehyde $\pm \sigma$ / $\mu$ mol (after 24 h) | Alcohol Conversion $\pm \sigma$ / (%) | H <sub>2</sub> $\pm \sigma$ / $\mu$ mol (after 24 h) | TON (24 h) $\pm \sigma$ / mol H <sub>2</sub> NiP <sup>-1</sup> | Activity/ $\mu$ mol H <sub>2</sub> (g CN <sub>x</sub> ) <sup>-1</sup> h <sup>-1</sup> (after 1h) | TOF $\pm \sigma$ / h <sup>-1</sup> (after 1h) |
|------------------------------------|------------|--------------------|--------------------|------------------------------------------------|---------------------------------------|------------------------------------------------------|----------------------------------------------------------------|--------------------------------------------------------------------------------------------------|-----------------------------------------------|
| <b><i>pH dependence</i></b>        |            |                    |                    |                                                |                                       |                                                      |                                                                |                                                                                                  |                                               |
| <b>1</b>                           | 50         | 30                 | 3                  | 14.63 $\pm$ 2.35                               | 48.77 $\pm$ 7.83                      | 13.13 $\pm$ 1.31                                     | 262.63 $\pm$ 26.26                                             | 293.36 $\pm$ 29.34                                                                               | 29.34 $\pm$ 2.93                              |
| <b>2</b>                           | 50         | 30                 | 4.5                | 19.80 $\pm$ 19.8                               | 66.0 $\pm$ 6.60                       | 21.27 $\pm$ 2.13                                     | 425.38 $\pm$ 42.54                                             | 311.18 $\pm$ 31.12                                                                               | 31.12 $\pm$ 3.11                              |
| <b>3</b>                           | 50         | 30                 | 6                  | 16.25 $\pm$ 1.62                               | 54.16 $\pm$ 5.42                      | 14.80 $\pm$ 1.48                                     | 296.02 $\pm$ 29.60                                             | 232.70 $\pm$ 23.27                                                                               | 23.27 $\pm$ 2.33                              |
| <b><i>[Alcohol] dependence</i></b> |            |                    |                    |                                                |                                       |                                                      |                                                                |                                                                                                  |                                               |
| <b>4</b>                           | 50         | 15                 | 4.5                | 11.93 $\pm$ 1.19                               | 79.51 $\pm$ 7.95                      | 13.46 $\pm$ 1.35                                     | 269.17 $\pm$ 26.92                                             | 266.89 $\pm$ 26.69                                                                               | 26.69 $\pm$ 2.67                              |
| <b>5</b>                           | 50         | 30                 | 4.5                | 19.80 $\pm$ 1.98                               | 66.0 $\pm$ 6.60                       | 21.27 $\pm$ 2.13                                     | 425.38 $\pm$ 42.54                                             | 311.18 $\pm$ 31.12                                                                               | 31.12 $\pm$ 3.11                              |
| <b>6</b>                           | 50         | 60                 | 4.5                | 16.54 $\pm$ 1.71                               | 27.57 $\pm$ 2.86                      | 15.46 $\pm$ 1.55                                     | 309.13 $\pm$ 30.91                                             | 240.59 $\pm$ 24.06                                                                               | 24.06 $\pm$ 2.41                              |
| <b><i>[NiP] dependence</i></b>     |            |                    |                    |                                                |                                       |                                                      |                                                                |                                                                                                  |                                               |
| <b>7</b>                           | 10         | 30                 | 4.5                | 8.60 $\pm$ 0.86                                | 28.67 $\pm$ 2.87                      | 2.48 $\pm$ 0.46                                      | 247.72 $\pm$ 46.10                                             | 86.83 $\pm$ 9.70                                                                                 | 43.42 $\pm$ 4.85                              |
| <b>8</b>                           | 25         | 30                 | 4.5                | 11.10 $\pm$ 2.46                               | 37.00 $\pm$ 8.19                      | 5.22 $\pm$ 1.21                                      | 208.95 $\pm$ 48.37                                             | 158.51 $\pm$ 15.85                                                                               | 31.70 $\pm$ 3.17                              |
| <b>9</b>                           | 50         | 30                 | 4.5                | 19.80 $\pm$ 1.98                               | 66.0 $\pm$ 6.60                       | 21.27 $\pm$ 2.13                                     | 425.38 $\pm$ 42.54                                             | 311.18 $\pm$ 31.12                                                                               | 31.12 $\pm$ 3.11                              |
| <b>10</b>                          | 100        | 30                 | 4.5                | 24.60 $\pm$ 2.95                               | 82.00 $\pm$ 9.85                      | 24.97 $\pm$ 2.50                                     | 249.72 $\pm$ 24.97                                             | 409.80 $\pm$ 40.98                                                                               | 20.49 $\pm$ 2.05                              |

**Table S2.** Time dependent solar light driven H<sub>2</sub> and aldehyde production in the presence of <sup>NCN</sup>CN<sub>x</sub> (5 mg), 4-MBA (30 μmol) and NiP (50 nmol) in aqueous KPi (0.02 M, pH 4.5, 3 mL) with 1 sun irradiation (AM 1.5G) in water-jacketed rack at 25°C. All the experiments showed 100% selectivity towards aldehyde formation and no carboxylic acid was detected.

| Entry     | Time / h | Aldehyde ± σ /<br>μmol | Alcohol Conversion ± σ /<br>(%) | H <sub>2</sub> ± σ /<br>μmol | TON ± σ /<br>mol H <sub>2</sub> NiP <sup>-1</sup> |
|-----------|----------|------------------------|---------------------------------|------------------------------|---------------------------------------------------|
| <b>11</b> | 1        | 2.37 ± 0.47            | 7.90 ± 1.56                     | 1.64 ± 0.16                  | 32.88 ± 3.23                                      |
| <b>12</b> | 2        | 3.55 ± 0.84            | 11.84 ± 2.79                    | 3.74 ± 0.37                  | 74.83 ± 7.48                                      |
| <b>13</b> | 3        | 5.33 ± 0.53            | 17.78 ± 1.78                    | 5.23 ± 0.52                  | 104.59 ± 10.46                                    |
| <b>14</b> | 4        | 6.55 ± 0.66            | 21.84 ± 2.18                    | 5.92 ± 0.59                  | 118.30 ± 11.83                                    |
| <b>15</b> | 5        | 6.65 ± 0.66            | 22.16 ± 2.22                    | 8.04 ± 0.80                  | 160.72 ± 16.07                                    |
| <b>16</b> | 6        | 8.27 ± 1.39            | 27.57 ± 4.64                    | 10.28 ± 1.03                 | 205.66 ± 20.57                                    |
| <b>17</b> | 12       | 11.47 ± 1.51           | 38.57 ± 4.64                    | 12.37 ± 1.24                 | 247.40 ± 24.74                                    |
| <b>18</b> | 24       | 19.80 ± 1.98           | 66.0 ± 6.60                     | 21.27 ± 2.13                 | 425.38 ± 42.54                                    |

**Table S3.** Photocatalytic H<sub>2</sub> and aldehyde production in the presence <sup>NCN</sup>CN<sub>x</sub> (5 mg), 4-MBA (30 μmol) and NiP (50 nmol) in aqueous KP<sub>i</sub> (0.02 M, pH 4.5, 3 mL) under visible-light-only (λ > 400 nm) irradiation. Control experiments were also performed in the absence of <sup>NCN</sup>CN<sub>x</sub>, NiP, 4-MBA and in dark. Different para substituted benzyl alcohol (BA) derivatives (30 μmol) were tested in the presence <sup>NCN</sup>CN<sub>x</sub> (5 mg) and NiP (50 nmol) in aqueous KP<sub>i</sub> (0.02 M, pH 4.5, 3 mL) under 1 sun irradiation (AM 1.5G). All the experiments showed 100% selectivity towards aldehyde formation and no carboxylic acid was detected unless specified otherwise.

| Entry                                                 | NiP / nmol                            | Alcohol              | Alcohol/<br>μmol | Aldehyde ± σ /<br>μmol (after 24 h) | Alcohol<br>Conversion<br>(%) | Selectivity ± σ<br>/ (%) | H <sub>2</sub> ± σ / μmol<br>(after 24 h) | TON (24 h) ± σ /<br>mol H <sub>2</sub> NiP <sup>-1</sup> | Activity/<br>(g CN <sub>x</sub> ) <sup>-1</sup> h <sup>-1</sup> (after<br>1h) | TOF ± σ / h <sup>-1</sup><br>(after 1h) |
|-------------------------------------------------------|---------------------------------------|----------------------|------------------|-------------------------------------|------------------------------|--------------------------|-------------------------------------------|----------------------------------------------------------|-------------------------------------------------------------------------------|-----------------------------------------|
| <b>Visible Light only Irradiation (λ &gt; 400 nm)</b> |                                       |                      |                  |                                     |                              |                          |                                           |                                                          |                                                                               |                                         |
| <b>19</b>                                             | 50                                    | 4-MBA                | 30               | 10.02 ± 2.08                        | 33.67 ± 6.50                 | 100                      | 10.31 ± 1.20                              | 206.25 ± 24.07                                           | 122.93 ± 12.29                                                                | 12.29 ± 1.23                            |
| <b>Control Experiments</b>                            |                                       |                      |                  |                                     |                              |                          |                                           |                                                          |                                                                               |                                         |
| <b>20</b>                                             | 0                                     | 4-MBA                | 30               | 7.30 ± 0.73                         | 24.33 ± 2.43                 | 100                      | 0.33 ± 0.03                               | –                                                        | 3.37 ± 3.37                                                                   | –                                       |
| <b>21</b>                                             | 50                                    | 0                    | –                | –                                   | –                            | –                        | 0.11 ± 0.02                               | 2.10 ± 0.30                                              | 16.04 ± 3.05                                                                  | 1.60 ± 0.31                             |
| <b>22</b>                                             | 50, No <sup>NCN</sup> CN <sub>x</sub> | 4-MBA                | 30               | 0                                   | 0                            | –                        | 0                                         | 0                                                        | –                                                                             | –                                       |
| <b>23</b>                                             | 50, dark                              | 4-MBA                | 30               | 0                                   | 0                            | –                        | 0                                         | 0                                                        | 0                                                                             | 0                                       |
| <b>Alcohol Dependence</b>                             |                                       |                      |                  |                                     |                              |                          |                                           |                                                          |                                                                               |                                         |
| <b>24</b>                                             | 50                                    | BA                   | 30               | 13.70 ± 2.70                        | 45.67 ± 9.02                 | 100                      | 21.47 ± 2.15                              | 429.55 ± 42.96                                           | 289.62 ± 39.48                                                                | 28.96 ± 3.95                            |
| <b>25</b>                                             | 50                                    | 4-OMeBA              | 30               | 13.73 ± 1.37                        | 45.78 ± 4.58                 | 100                      | 9.84 ± 0.98                               | 196.70 ± 19.67                                           | 233.33 ± 23.33                                                                | 23.33 ± 2.33                            |
| <b>26</b>                                             | 50                                    | 4-CIBA               | 30               | 13.4 ± 2.11                         | 44.67 ± 7.02                 | 100                      | 14.06 ± 2.98                              | 281.23 ± 59.60                                           | 254.09 ± 25.41                                                                | 25.41 ± 2.51                            |
| <b>27</b>                                             | 50                                    | 4-CF <sub>3</sub> BA | 30               | 1.83 ± 0.61                         | 6.09 ± 2.03                  | 100                      | 5.15 ± 0.55                               | 103.09 ± 11.04                                           | 99.60 ± 9.96                                                                  | 9.96 ± 1.00                             |
| <b>28</b>                                             | 50                                    | 4- <sup>t</sup> BuBA | 30               | 7.84 ± 1.41                         | 40.83 ± 9.00                 | 64.33 ± 3.21*            | 9.90 ± 0.99                               | 198.07 ± 19.80                                           | 823.24 ± 82.32                                                                | 82.32 ± 8.23                            |
| <b>29</b>                                             | 50                                    | MeOH                 | 30               | 0                                   | 0                            | –                        | 0                                         | 0                                                        | 0                                                                             | 0                                       |

\*These experiments resulted in 41% alcohol oxidation with 64% selectivity towards 4-*tert*-Butylbenzaldehyde and 36% to 4-*tert*-Butylbenzoic acid formation.

**Table S4.** Solar light driven H<sub>2</sub> and aldehyde production in the presence of <sup>NCN</sup>CN<sub>x</sub> (5 mg), 4-MBA (30 μmol) and NiP (50 nmol) in aqueous sodium acetate buffer, and KP<sub>i</sub> (pH 4.5, 3 mL) at different concentrations under 1 sun irradiation (AM 1.5G). Sacrificial conditions were also tested in EDTA (0.1 M, pH 4.5, 3 mL), TEOA (0.1 M, pH 4.5, 3 mL) and in KP<sub>i</sub> (0.02 M, pH 4.5, 3 mL) under air. All the experiments showed 100% selectivity towards aldehyde formation and no carboxylic acid was detected unless specified otherwise.

| Entry                         | NiP / nmol | Alcohol | Alcohol/ μmol | Solution                                         | Solution Concentration | Aldehyde ± σ / μmol (after 24 h) | Alcohol Conversion ± σ / (%) | H <sub>2</sub> ± σ / μmol (after 24 h) | TON (24 h) ± σ / mol H <sub>2</sub> NiP <sup>-1</sup> | Activity/ μmol H <sub>2</sub> (g CN <sub>x</sub> ) <sup>-1</sup> h <sup>-1</sup> (after 1h) | TOF ± σ / h <sup>-1</sup> (after 1h) |
|-------------------------------|------------|---------|---------------|--------------------------------------------------|------------------------|----------------------------------|------------------------------|----------------------------------------|-------------------------------------------------------|---------------------------------------------------------------------------------------------|--------------------------------------|
| <b>Solution dependence</b>    |            |         |               |                                                  |                        |                                  |                              |                                        |                                                       |                                                                                             |                                      |
| <b>30</b>                     | 50         | 4-MBA   | 30            | CH <sub>3</sub> COONa                            | 0.1 M                  | 12.03 ± 1.20                     | 40.11 ± 4.01                 | 9.69 ± 0.97                            | 193.74 ± 19.37                                        | 360.02 ± 36.00                                                                              | 36.00 ± 3.60                         |
| <b>31</b>                     | 50         | 4-MBA   | 30            | KP <sub>i</sub>                                  | 0.1 M                  | 24.90 ± 2.49                     | 83.0 ± 8.30                  | 20.44 ± 2.04                           | 408.76 ± 40.88                                        | 762.70 ± 76.27                                                                              | 76.27 ± 7.63                         |
| <b>32</b>                     | 50         | 4-MBA   | 30            | KP <sub>i</sub>                                  | 0.5 M                  | 18.13 ± 1.81                     | 60.44 ± 6.04                 | 18.62 ± 1.86                           | 372.39 ± 37.24                                        | 1114.21 ± 111.42                                                                            | 111.42 ± 11.14                       |
| <b>33</b>                     | 50         | 4-MBA   | 30            | KP <sub>i</sub> + KCl                            | 0.02 M + 0.08 M        | 20.27 ± 3.77                     | 67.56 ± 12.58                | 23.34 ± 2.33                           | 466.78 ± 46.68                                        | 539.28 ± 59.12                                                                              | 53.93 ± 5.91                         |
| <b>34</b>                     | 50         | 4-MBA   | 30            | KP <sub>i</sub> + K <sub>2</sub> SO <sub>4</sub> | 0.02 M + 0.08 M        | 20.00 ± 2.00                     | 66.67 ± 6.67                 | 20.97 ± 2.10                           | 419.45 ± 41.95                                        | 492.04 ± 49.20                                                                              | 49.20 ± 4.92                         |
| <b>Sacrificial Conditions</b> |            |         |               |                                                  |                        |                                  |                              |                                        |                                                       |                                                                                             |                                      |
| <b>35</b>                     | 50         | 0       | –             | EDTA                                             | 0.1 M                  | –                                | –                            | 21.21 ± 2.12                           | 424.18 ± 42.42                                        | 532.32 ± 53.22                                                                              | 52.23 ± 5.23                         |
| <b>36</b>                     | 0          | 4-MBA   | 30            | KP <sub>i</sub> , under air                      | –                      | 6.04 ± 2.09                      | 100†                         | –                                      | –                                                     | –                                                                                           | –                                    |
| <b>37</b>                     | 0, dark    | 4-MBA   | 30            | KP <sub>i</sub> , under air                      | –                      | 0                                | 0                            | –                                      | –                                                     | –                                                                                           | –                                    |

†These experiments resulted in 100% alcohol conversion with 70% selectivity towards 4-methyl benzoic acid, 20% 4-methyl benzaldehyde and 10% to further oxidation products (benzene-1, 4-dicarbaldehyde and 4-formylbenzoic acid) formation.

**Table S5.** Photocatalytic H<sub>2</sub> and aldehyde production with <sup>H2N</sup>CN<sub>x</sub> (5 mg), 4-MBA (30 μmol) and NiP (50 nmol) in KP<sub>i</sub> (0.02 M, pH 4.5, 3 mL) were conducted under 1 sun irradiation (AM 1.5G, 25°C). Photocatalytic experiments in the presence of <sup>NCN</sup>CN<sub>x</sub> (5 mg) or <sup>H2N</sup>CN<sub>x</sub> (5 mg), 4-MBA (30 μmol) and H<sub>2</sub>PtCl<sub>6</sub> (10 μL, 8 wt. %) in KP<sub>i</sub> (0.02 M, pH 4.5, 3 mL) were also carried out. A control experiment in EDTA (0.1 M, pH 4.5, 3 mL) solution with 4-methyl benzaldehyde (4-MBAAd), <sup>NCN</sup>CN<sub>x</sub> (5 mg) and H<sub>2</sub>PtCl<sub>6</sub> was also tested. All the experiments showed 100% selectivity towards aldehyde formation and no carboxylic acid was detected unless specified otherwise.

| Entry                     | Catalyst used   | CN <sub>x</sub> type           | Substrate | Solution        | Aldehyde ± σ / μmol (after 24 h) | Substrate Conversion ± σ / (%) | H <sub>2</sub> ± σ / μmol (after 24 h) | TON (24 h) ± σ / mol H <sub>2</sub> NiP <sup>-1</sup> | Activity/ μmol H <sub>2</sub> (g CN <sub>x</sub> ) <sup>-1</sup> h <sup>-1</sup> (after 1h) | TOF ± σ / h <sup>-1</sup> (after 1h) |
|---------------------------|-----------------|--------------------------------|-----------|-----------------|----------------------------------|--------------------------------|----------------------------------------|-------------------------------------------------------|---------------------------------------------------------------------------------------------|--------------------------------------|
| <b>Irradiate for 4 h</b>  |                 |                                |           |                 |                                  |                                |                                        |                                                       |                                                                                             |                                      |
| 38                        | NiP             | <sup>H2N</sup> CN <sub>x</sub> | 4-MBA     | KP <sub>i</sub> | 1.44 ± 0.71                      | 4.80 ± 2.36                    | 2.02 ± 0.20                            | 40.31 ± 4.03                                          | 125.05 ± 12.50                                                                              | 12.50 ± 1.25                         |
| 39                        | Pt <sup>#</sup> | <sup>H2N</sup> CN <sub>x</sub> | 4-MBA     | KP <sub>i</sub> | 1.28 ± 0.55                      | 4.26 ± 1.85                    | 0                                      | 0                                                     | 0                                                                                           | 0                                    |
| 40                        | Pt <sup>#</sup> | <sup>NCN</sup> CN <sub>x</sub> | 4-MBA     | KP <sub>i</sub> | 1.79 ± 1.21                      | 5.98 ± 4.05                    | 1.56 ± 0.16                            | 0.80 ± 0.08                                           | 170.68 ± 18.97                                                                              | 0.44 ± 0.05                          |
| <b>Irradiate for 24 h</b> |                 |                                |           |                 |                                  |                                |                                        |                                                       |                                                                                             |                                      |
| 41                        | NiP             | <sup>H2N</sup> CN <sub>x</sub> | 4-MBA     | KP <sub>i</sub> | 1.44 ± 0.71                      | 4.80 ± 2.36                    | 2.49 ± 0.71                            | 49.79 ± 14.18                                         | 117.30 ± 11.73                                                                              | 11.73 ± 1.17                         |
| 42                        | Pt <sup>#</sup> | <sup>NCN</sup> CN <sub>x</sub> | 4-MBA     | KP <sub>i</sub> | 11.99 ± 2.29                     | 41.1 ± 7.85 <sup>‡</sup>       | 14.22 ± 1.42                           | 7.29 ± 0.73                                           | 138.43 ± 13.08                                                                              | 0.35 ± 0.03                          |
| 43                        | Pt <sup>#</sup> | <sup>NCN</sup> CN <sub>x</sub> | 4-MBAAd   | EDTA            | 5.42 ± 0.54                      | 18.07 ± 1.81 <sup>**</sup>     | 3.50 ± 0.44                            | 1.79 ± 0.23                                           | 9.46 ± 4.88                                                                                 | 0.02 ± 0.01                          |

<sup>#</sup>These experiments were conducted in the presence of 10 μL of 8 wt% aqueous solution of H<sub>2</sub>PtCl<sub>6</sub> corresponding for 8 wt% Pt loading (in the absence of NiP).

<sup>‡</sup>These experiments resulted in 41% alcohol oxidation with 97:3% selectivity towards 4-methyl benzaldehyde and 4-methylbenzoic acid formation respectively.

<sup>\*\*</sup> These experiments resulted in 18% 4-methylbenzoic acid formation.

**Table S6.** Photocatalytic H<sub>2</sub> and aldehyde production in the presence of <sup>NCN</sup>CN<sub>x</sub> (5 mg), 4-MBA (30 μmol) and NiP (50 nmol) in KP<sub>i</sub> (0.02 M, pH 4.5, 3 mL) with the addition of neutral density filters (50% and 80% absorbance of the incident light) were conducted. All the experiments showed 100% selectivity towards aldehyde formation and no carboxylic acid was detected.

| Entry                              | Aldehyde ± σ / μmol (after 1 h) | Alcohol Conversion ± σ / (%) | Selectivity ± σ / (%) | H <sub>2</sub> ± σ / μmol (after 1 h) | Activity/ μmol H <sub>2</sub> (g CN <sub>x</sub> ) <sup>-1</sup> h <sup>-1</sup> (after 1h) | TOF ± σ / h <sup>-1</sup> (after 1h) |
|------------------------------------|---------------------------------|------------------------------|-----------------------|---------------------------------------|---------------------------------------------------------------------------------------------|--------------------------------------|
| <b>No neutral density filter</b>   |                                 |                              |                       |                                       |                                                                                             |                                      |
| 44                                 | 2.29 ± 0.23                     | 7.64 ± 0.76                  | 100                   | 1.49 ± 0.15                           | 297.73 ± 18.29                                                                              | 29.77 ± 1.83                         |
| <b>50 % neutral density filter</b> |                                 |                              |                       |                                       |                                                                                             |                                      |
| 45                                 | 1.37 ± 0.16                     | 4.27 ± 0.43                  | 100                   | 0.95 ± 0.10                           | 190.01 ± 12.35                                                                              | 19.00 ± 1.90                         |
| <b>80 % neutral density filter</b> |                                 |                              |                       |                                       |                                                                                             |                                      |
| 46                                 | 0.88 ± 0.09                     | 2.94 ± 0.29                  | 100                   | 0.54 ± 0.05                           | 108.30 ± 1.87                                                                               | 10.83 ± 1.08                         |

**Table S7.** Long-term photocatalytic H<sub>2</sub> and Aldehyde production in the presence of <sup>NCN</sup>CN<sub>x</sub> (5 mg), 4-MBA (30 μmol) and NiP (50 nmol) in KP<sub>i</sub> (0.02 M, pH 4.5, 3 mL) under 1 sun irradiation (AM 1.5G, 25°C). After 25 h of irradiation, fresh NiP (50 nmol), fresh 4-MBA (30 μmol), and both NiP (50 nmol) and 4-MBA (30 μmol) were added to photoreactors to test the system re-activation, and placed back into solar light simulator for monitoring over 25 more h (Total irradiation time of 50 h). All the experiments showed 100% selectivity towards aldehyde formation and no carboxylic acid was detected.

| Entry                                          | NiP / nmol | Alcohol/ μmol | Aldehyde ± σ / μmol | Alcohol Conversion ± σ / (%) | H <sub>2</sub> ± σ / μmol | Activity/ μmol H <sub>2</sub> (g CN <sub>x</sub> ) <sup>-1</sup> h <sup>-1</sup> (after 1h) | TOF ± σ / h <sup>-1</sup> (after 1h) |
|------------------------------------------------|------------|---------------|---------------------|------------------------------|---------------------------|---------------------------------------------------------------------------------------------|--------------------------------------|
| <b>Re-activation by NiP addition</b>           |            |               |                     |                              |                           |                                                                                             |                                      |
| 47                                             | 50+50      | 30            | 25.04 ± 2.90        | 83.47 ± 9.66                 | 26.96 ± 2.70              | 244.59 ± 24.46                                                                              | 24.46 ± 2.45                         |
| <b>Re-activation by 4-MBA addition</b>         |            |               |                     |                              |                           |                                                                                             |                                      |
| 48                                             | 50         | 30+30         | 13.47 ± 2.40        | 22.44 ± 3.99                 | 16.97 ± 1.70              | 230.21 ± 12.92                                                                              | 23.02 ± 2.30                         |
| <b>Re-activation by NiP and 4-MBA addition</b> |            |               |                     |                              |                           |                                                                                             |                                      |
| 49                                             | 50+50      | 30+30         | 21.13 ± 2.21        | 35.21 ± 3.68                 | 28.29 ± 2.83              | 227.86 ± 6.45                                                                               | 22.79 ± 2.28                         |



**Table S8.** Two photoreactors were prepared with  $^{NCN}CN_x$  (5 mg) and 4-MBA (30  $\mu$ mol) in the absence of **NiP** in an aqueous  $KP_i$  solution (0.02 M, pH 4.5, 3 mL) and irradiated for 4 h under 1 sun (AM 1.5G, 25°C). The vials were then taken into the dark, **NiP** (50 nmol) was added to one of them and the  $H_2$  production was monitored for both of the vials over the next 20 h.

| Entry                                                    | NiP / nmol | Aldehyde $\pm \sigma$ / $\mu$ mol | Alcohol Conversion $\pm \sigma$ / (%) | $H_2 \pm \sigma$ / $\mu$ mol | TON (24 h) $\pm \sigma$ / mol $H_2$ NiP $^{-1}$ | Activity/ $\mu$ mol $H_2$ (g $CN_x$ ) $^{-1}$ h $^{-1}$ (after 1h) | TOF $\pm \sigma$ / h $^{-1}$ (after 1h) |
|----------------------------------------------------------|------------|-----------------------------------|---------------------------------------|------------------------------|-------------------------------------------------|--------------------------------------------------------------------|-----------------------------------------|
| <b><i>Irradiate for 4h and move to dark</i></b>          |            |                                   |                                       |                              |                                                 |                                                                    |                                         |
| <b>50</b>                                                | 0          | 1.56 $\pm$ 0.40                   | 5.18 $\pm$ 1.34                       | 0.26 $\pm$ 0.03              | –                                               | 9.34 $\pm$ 0.09                                                    | –                                       |
| <b><i>Irradiate for 4h, move to dark and add NiP</i></b> |            |                                   |                                       |                              |                                                 |                                                                    |                                         |
| <b>51</b>                                                | 50         | 1.97 $\pm$ 0.65                   | 6.50 $\pm$ 2.17                       | 1.24 $\pm$ 0.12              | 24.89 $\pm$ 2.49                                | 11.71 $\pm$ 1.17                                                   | 1.17 $\pm$ 0.12                         |

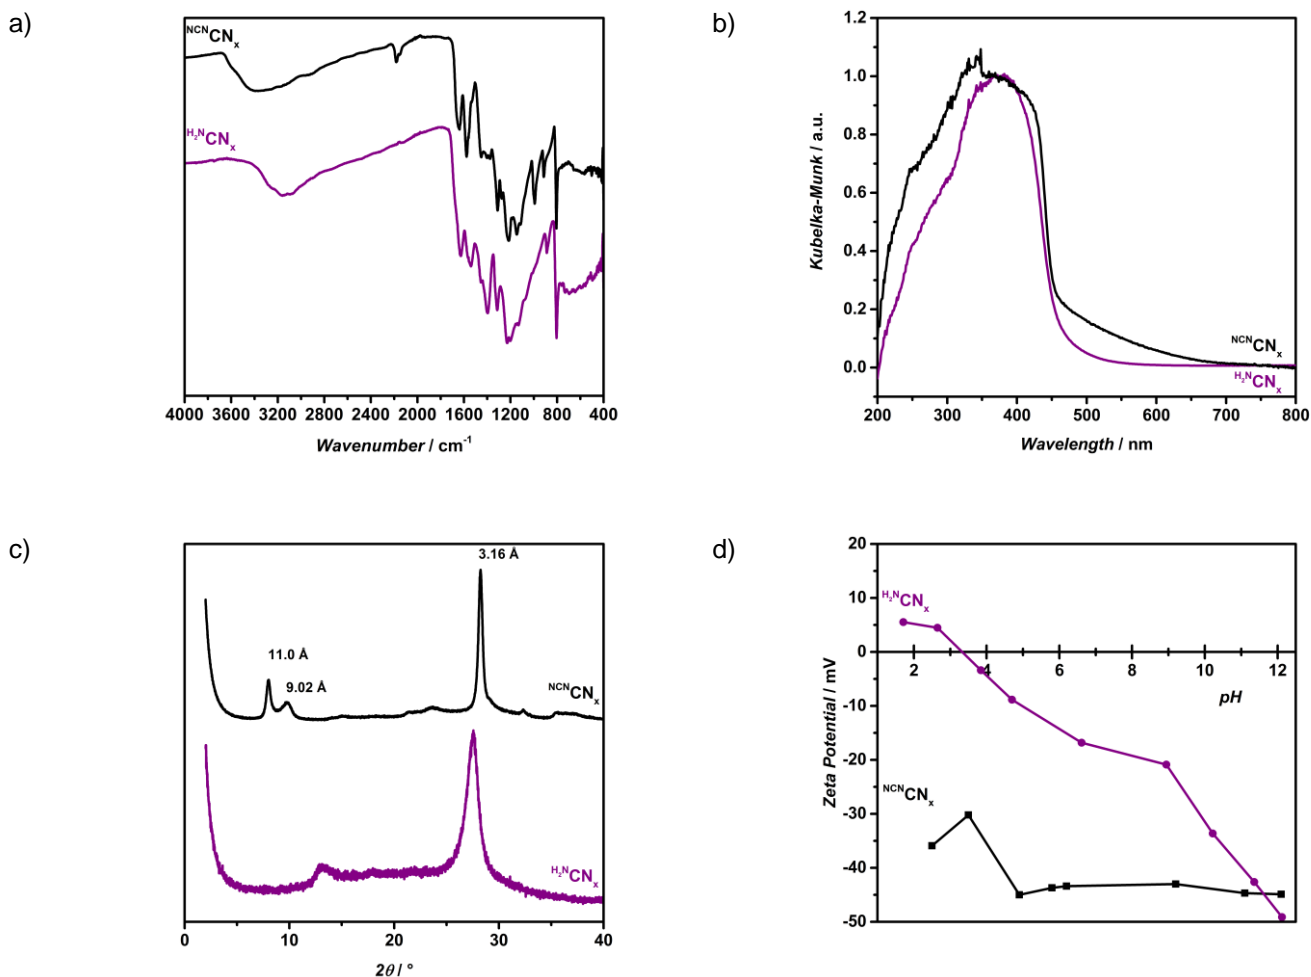

**Figure S1.** a) Fourier transform infrared spectroscopy (FTIR) spectra of  $\text{H}_2\text{N-CN}_x$  and  $\text{NCN-CN}_x$ . Both  $\text{H}_2\text{N-CN}_x$  and  $\text{NCN-CN}_x$  showed characteristic heptazine core IR vibration at  $804\text{ cm}^{-1}$  and bridging secondary amine -C-N bending vibrations at  $1311$  and  $1221\text{ cm}^{-1}$ , confirming the polymeric nature of the materials. The appearance of the C≡N stretch at  $2177\text{ cm}^{-1}$  in the IR spectrum of  $\text{NCN-CN}_x$  confirmed the presence of cyanamide group. b) Diffuse reflectance UV-vis spectra of  $\text{H}_2\text{N-CN}_x$  and  $\text{NCN-CN}_x$ . c) X-ray diffraction (XRD) patterns of  $\text{H}_2\text{N-CN}_x$  and  $\text{NCN-CN}_x$ . d) Zeta potential measurement for  $\text{H}_2\text{N-CN}_x$  and  $\text{NCN-CN}_x$ . Zeta potential of  $\text{NCN-CN}_x$  is  $-44\text{ eV}$  across all pH where the material is stable ( $\text{pH} > 4$ ), which is attributed to the anionic cyanamide group on the surface. At pH below 4, the material lost its yellow color and turned white, indicative of cyanamide hydrolysis.<sup>1</sup>

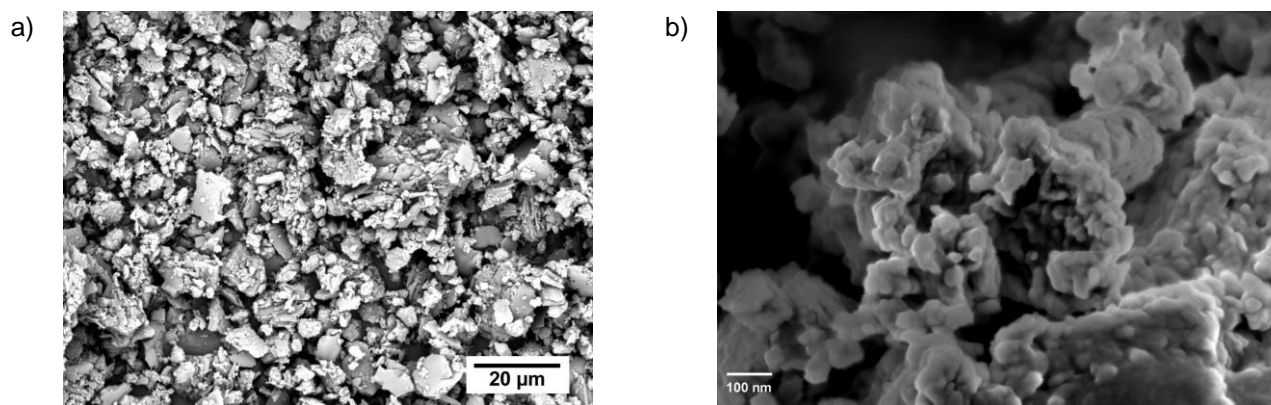

**Figure S2.** Scanning electron microscopy (SEM) image of a)  $\text{H}_2\text{N CN}_x$  and b)  $\text{NCN CN}_x$ .<sup>1</sup>

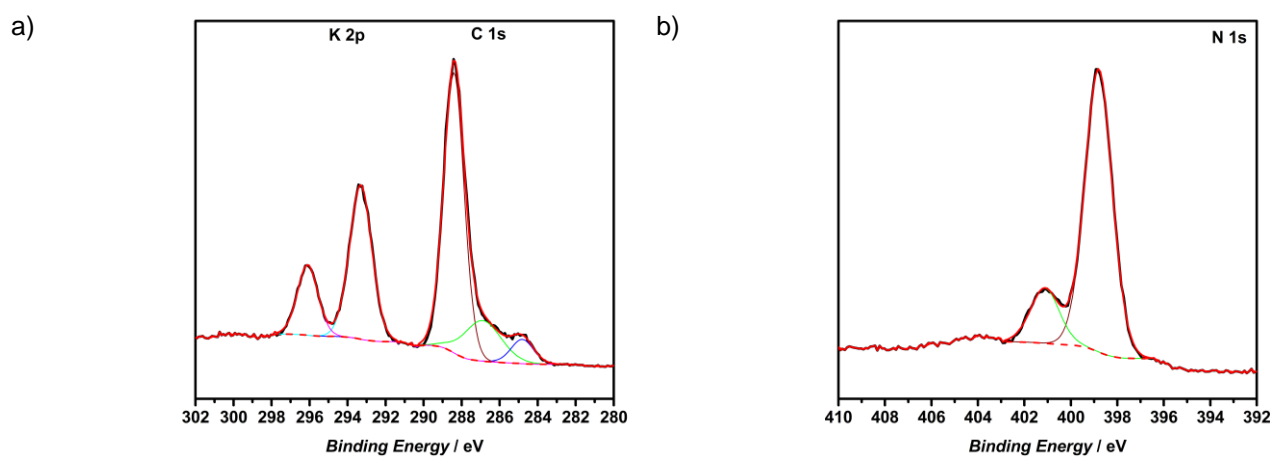

**Figure S3.** X-ray photoelectron spectra (XPS) of  $\text{NCN CN}_x$  in the regions of a)  $\text{K}_{2p}$  and  $\text{C}_{1s}$  and b)  $\text{N}_{1s}$ . The heptazine core was identified by the presence of  $\text{sp}^2$  carbon, 288.4 eV, and nitrogen, 398.8 eV, signals. The polymeric nature of the material was confirmed by the appearance of an XPS signal at 401.1 eV corresponding for the bridging secondary amine groups.<sup>2</sup>

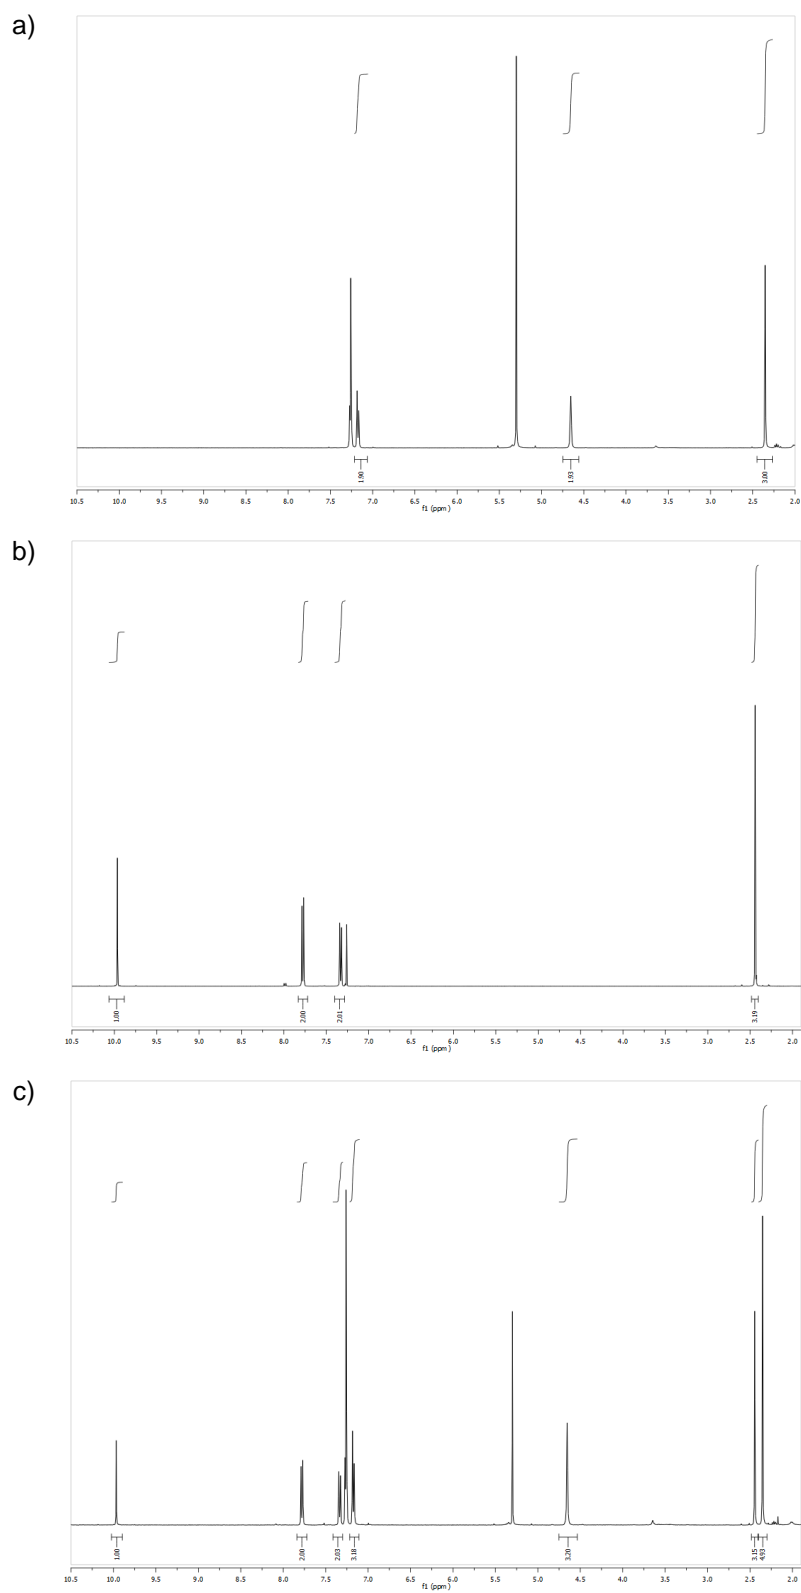

**Figure S4.** a)  $^1\text{H}$  NMR spectra of 4-MBA, b)  $^1\text{H}$  NMR spectra of 4-MBA<sub>d</sub>, c) a representative  $^1\text{H}$  NMR spectra of the residue extracted after 24 h of irradiation in  $\text{CDCl}_3$ .

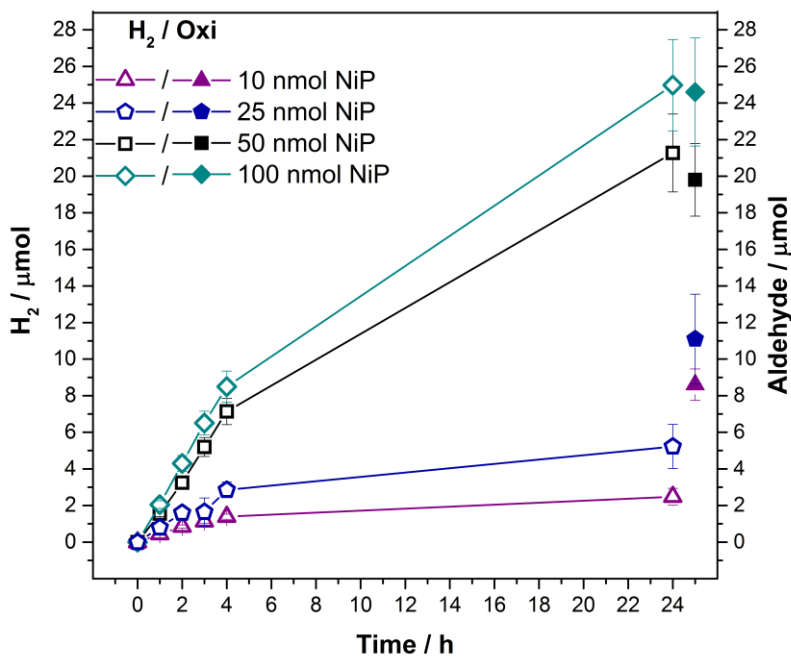

**Figure S5.** Photocatalytic H<sub>2</sub> and aldehyde production in an aqueous KP<sub>i</sub> solution (0.02 M, pH 4.5, 3 mL) with <sup>NCN</sup>CN<sub>x</sub> (5 mg), 4-MBA (30 μmol) and different amount of NiP (1 sun irradiation, 100mW cm<sup>-2</sup>, AM 1.5G, 25°C).

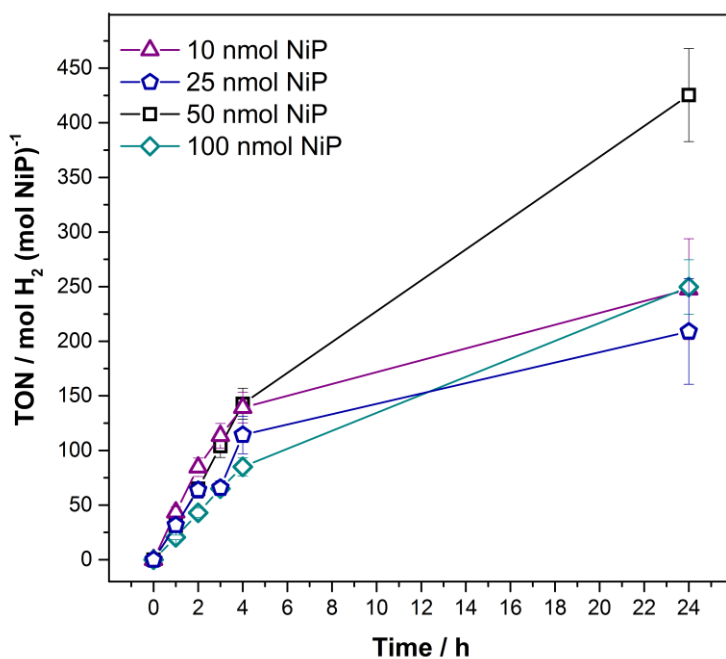

**Figure S6.** Photocatalytic TON<sub>NiP</sub> in an aqueous KP<sub>i</sub> solution (0.02 M, pH 4.5, 3 mL) with <sup>NCN</sup>CN<sub>x</sub> (5 mg), 4-MBA (30 μmol) and different amount of NiP (1 sun irradiation, 100mW cm<sup>-2</sup>, AM 1.5G, 25°C).

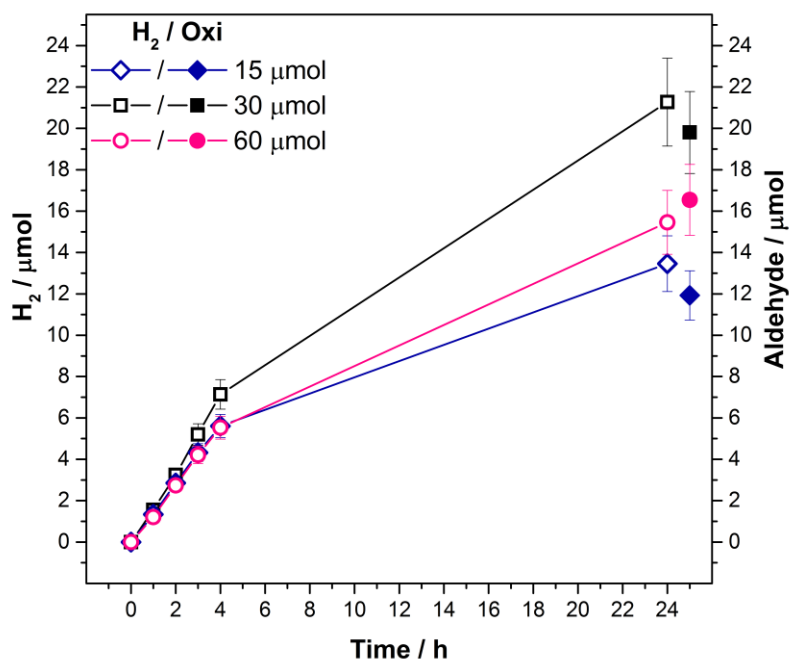

**Figure S7.** Photocatalytic H<sub>2</sub> and aldehyde production in the presence of <sup>NCN</sup>CN<sub>x</sub> (5 mg) and NiP (50 nmol) with a varying amount of 4-MBA in an aqueous KP<sub>i</sub> (0.02 M, pH 4.5, 3 mL) under 1 sun irradiation (100 mW cm<sup>-2</sup>, AM 1.5G, 25°C).

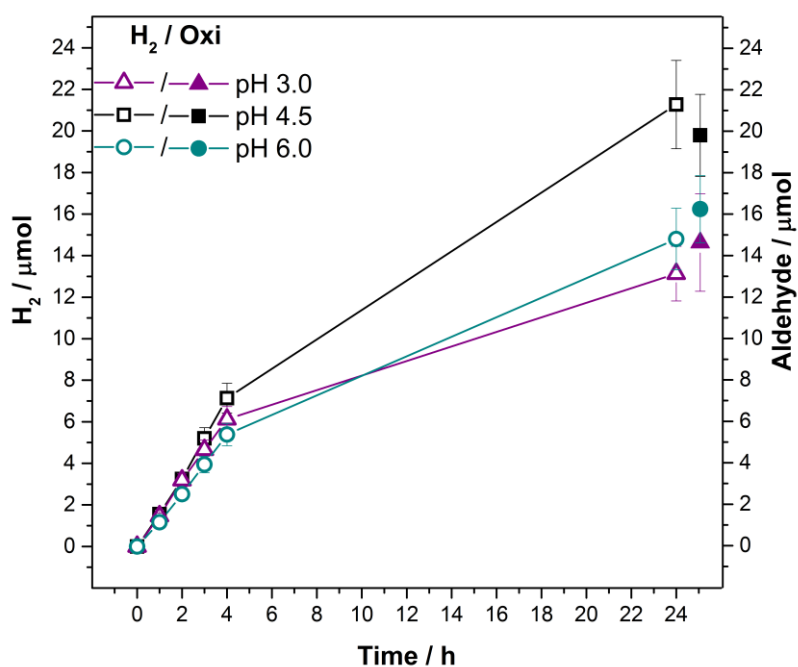

**Figure S8.** Photocatalytic H<sub>2</sub> and aldehyde production in the presence of <sup>NCN</sup>CN<sub>x</sub> (5 mg), 4-MBA (30 μmol) with NiP (50 nmol) in an aqueous KP<sub>i</sub> solution at various pH values (0.02 M, 3 mL) under 1 sun irradiation (100 mW cm<sup>-2</sup>, AM 1.5G, 25°C).

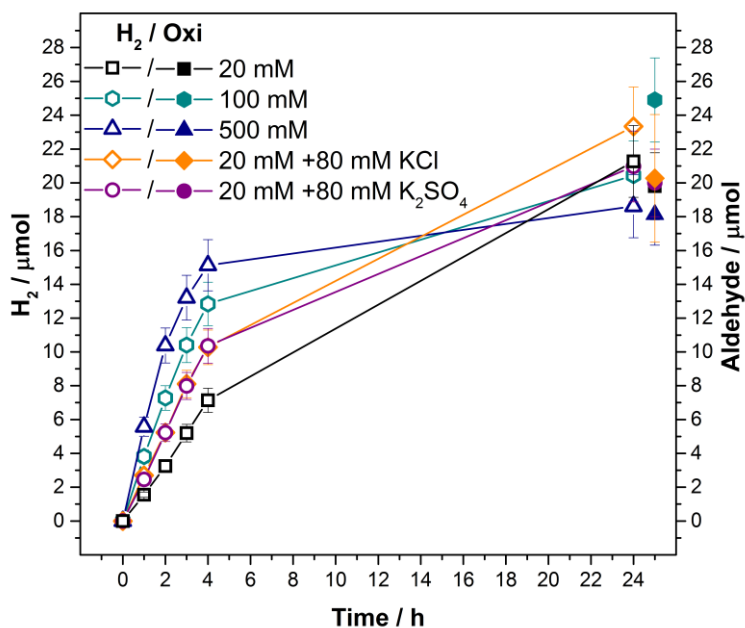

**Figure S9.** Photocatalytic H<sub>2</sub> and aldehyde production in the presence of <sup>NCN</sup>CN<sub>x</sub> (5 mg), 4-MBA (30 μmol) and NiP (50 nmol) with varying the aqueous KP<sub>i</sub> concentrations (pH 4.5, 3 mL) under 1 sun irradiation (100 mW cm<sup>-2</sup>, AM 1.5G, 25 °C).

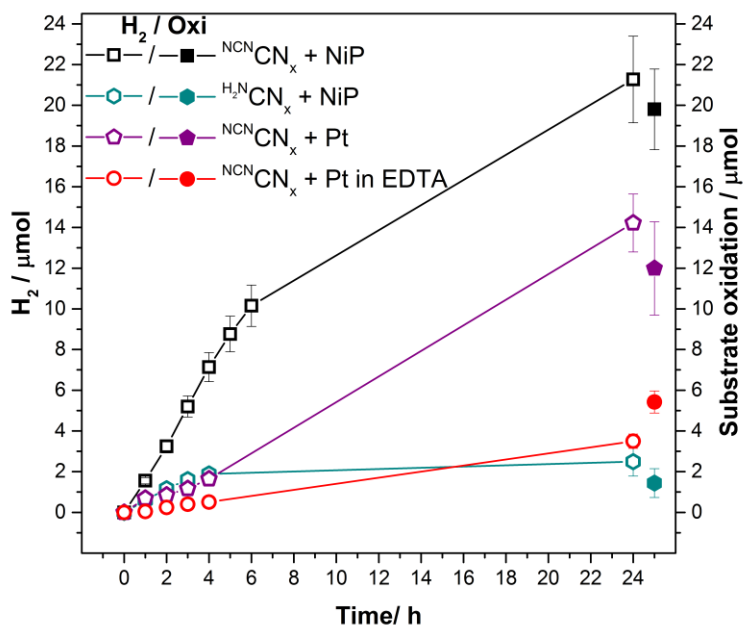

**Figure S10.** Photocatalytic H<sub>2</sub> and aldehyde production with <sup>NCN</sup>CN<sub>x</sub> or <sup>H<sub>2</sub>N</sup>CN<sub>x</sub> (5 mg), in the presence of 4-MBA (30 μmol) and NiP (50 nmol) in KP<sub>i</sub> (0.02 M, pH 4.5, 3 mL) were conducted under 1 sun irradiation (AM 1.5G, 25°C). Photocatalytic experiments in the presence of <sup>NCN</sup>CN<sub>x</sub>, 4-MBA (30 μmol) and H<sub>2</sub>PtCl<sub>6</sub> (10 μL, 8 wt. %) in KP<sub>i</sub> (0.02 M, pH 4.5, 3 mL) was also carried out. A control experiment in sacrificial EDTA solution (0.1 M, pH 4.5, 3 mL), <sup>NCN</sup>CN<sub>x</sub> (5 mg), Pt (10 μL, 8 wt. %) and 4-MBA (30 μmol) in the absence of NiP was carried out, to verify that Pt is only catalytically involved in proton reduction.

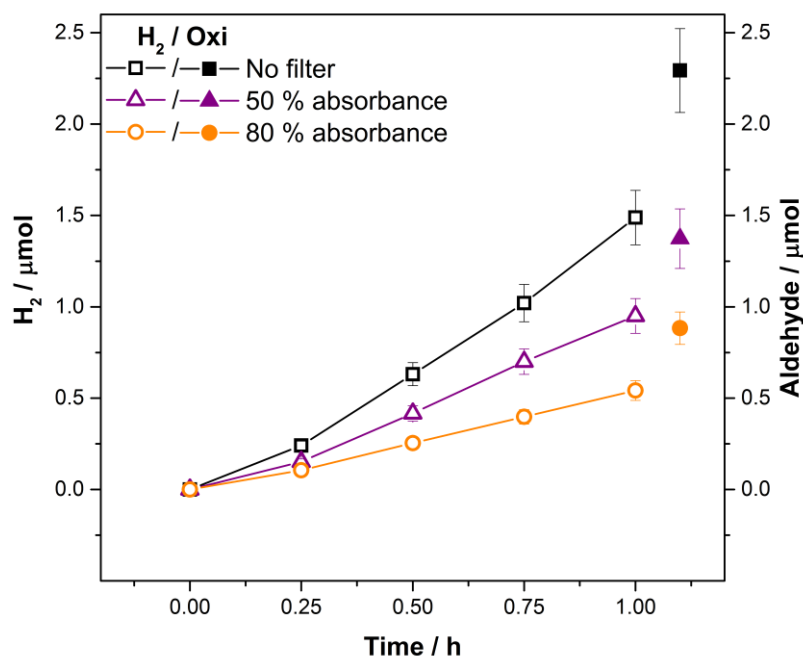

**Figure S11.** Photocatalytic H<sub>2</sub> and aldehyde production in the presence of <sup>NCN</sup>CN<sub>x</sub> (5 mg), 4-MBA (30 μmol) and NiP (50 nmol) in an aqueous KP<sub>i</sub> solution (0.02 M, pH 4.5, 3 mL) under 1 sun irradiation (AM 1.5G, 25°C), followed by the addition of neutral filter density filters that absorbs 50% and 80% of the incident light.

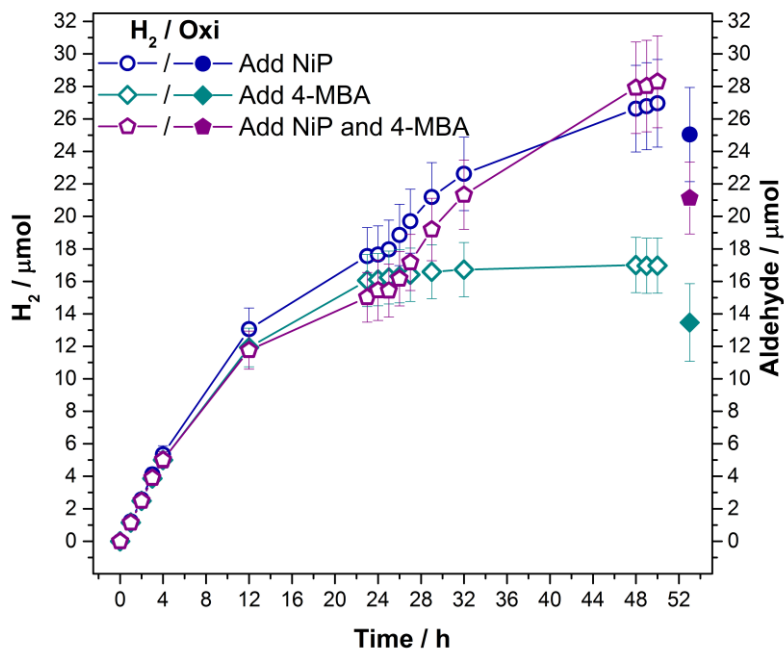

**Figure S12.** Long-term photocatalytic H<sub>2</sub> and aldehyde production in the presence of <sup>NCN</sup>CN<sub>x</sub> (5 mg), 4-MBA (30 μmol) and NiP (50 nmol) in an aqueous KP<sub>i</sub> (0.02 M, pH 4.5, 3mL) under 1 sun irradiation (AM 1.5G, 25°C). After 25 h of irradiation, NiP (50 nmol), 4-MBA (30 μmol), and both NiP (50 nmol) and 4-MBA (30 μmol) were added to photoreactors to test the system re-activation over the next 25 h of irradiation.



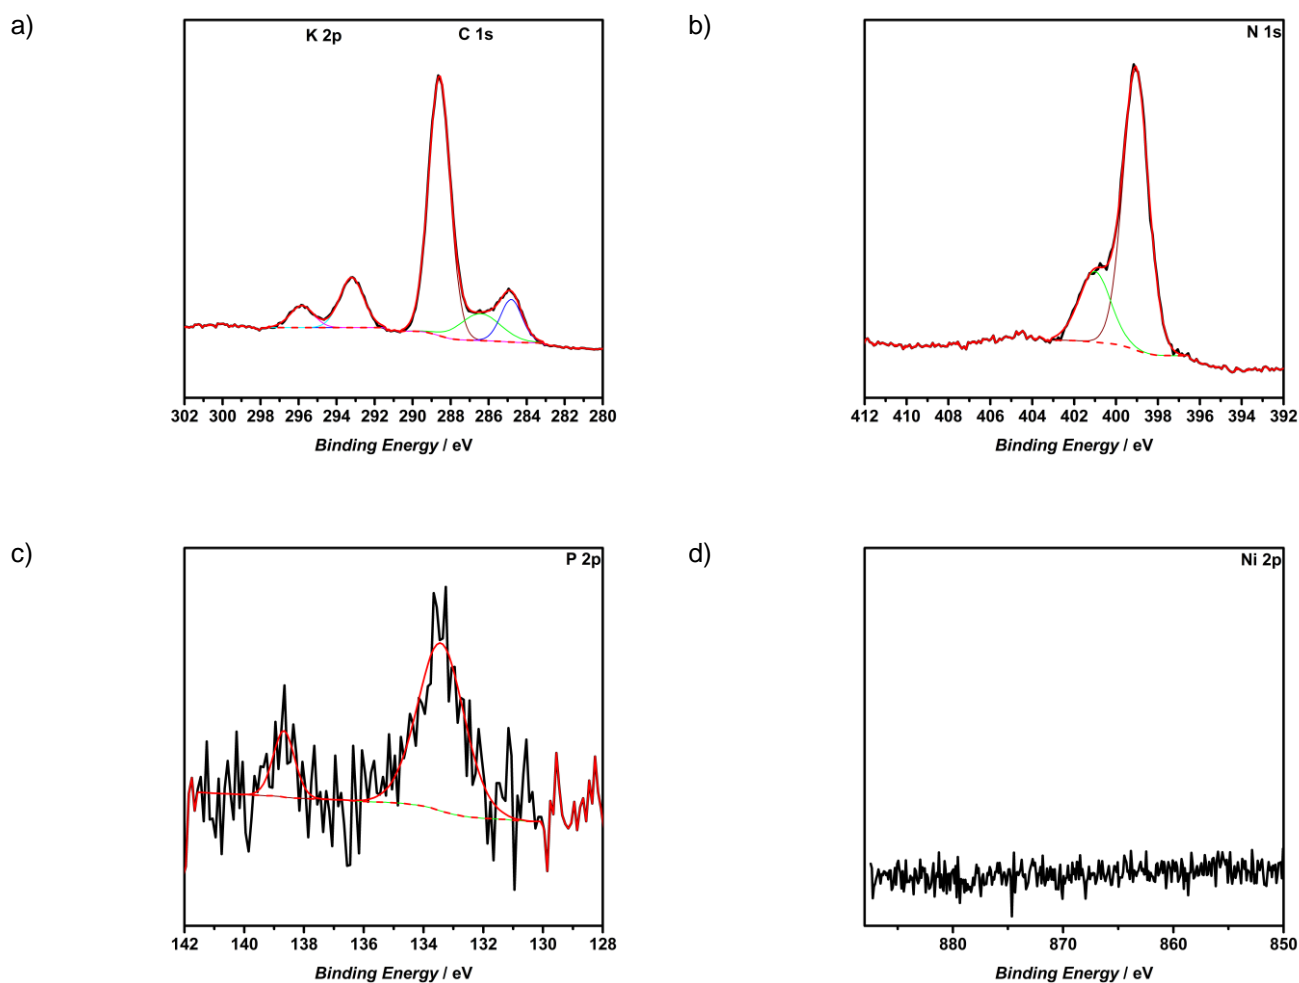

**Figure S13.** Characterization of  $\text{NCN}_x$  after 24 hours of irradiation, in the presence of  $\text{NCN}_x$  (5 mg), 4-MBA (30  $\mu\text{mol}$ ) and **NiP** (50 nmol) in  $\text{KP}_i$  (0.02 M, pH 4.5, 3 mL) solution (1 sun irradiation, AM 1.5G, 25°C), with XPS in the regions of a) K<sub>2p</sub> and C<sub>1s</sub>, b) N<sub>1s</sub>, c) P<sub>2p</sub> and d) Ni<sub>2p</sub>. The K<sub>2p</sub> and C<sub>1s</sub> as well as N<sub>1s</sub> spectrum are in good correlation with XPS results obtained from  $\text{NCN}_x$  prior to photocatalysis. In the Ni<sub>2p</sub> spectrum, there is no signal, indicating that most probably there is not any **NiP** catalyst physically adsorbed on the material surface after 24 hours of irradiation. The peaks in P<sub>2p</sub> spectrum is likely to be due to phosphate buffer used during photocatalysis.

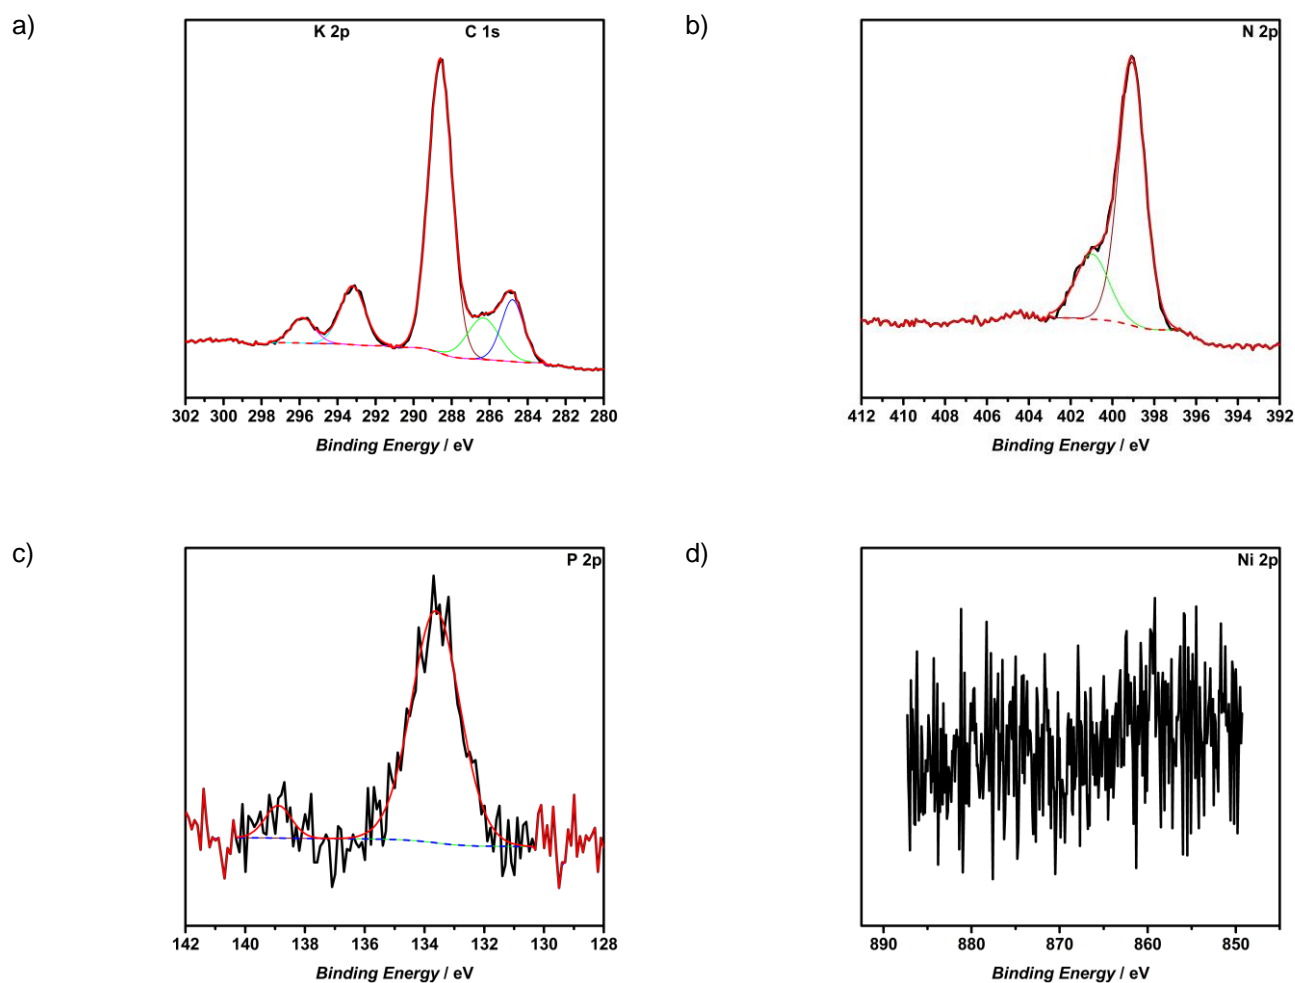

**Figure S14.** Characterization of  $\text{NCN}_x$  24 hours of irradiation, in the presence of  $\text{NCN}_x$  (5 mg) and 4-MBA (30  $\mu\text{mol}$ ) in  $\text{KP}_i$  (0.02 M, pH 4.5, 3 mL) solution (1 sun irradiation, AM 1.5G, 25°C), with XPS in the regions of a)  $\text{K}_{2p}$  and  $\text{C}_{1s}$ , b)  $\text{N}_{1s}$ , c)  $\text{P}_{2p}$  and d)  $\text{Ni}_{2p}$ . The  $\text{K}_{2p}$  and  $\text{C}_{1s}$  as well as  $\text{N}_{1s}$  spectrum are in good correlation with XPS results obtained from pure  $\text{NCN}_x$  prior to photocatalysis. The peaks in  $\text{P}_{2p}$  spectrum is likely to be due to phosphate buffer used during photocatalysis. As predicted, no peak in  $\text{Ni}_{2p}$  spectrum was detected as the photocatalysis was performed in the absence of  $\text{NiP}$ .

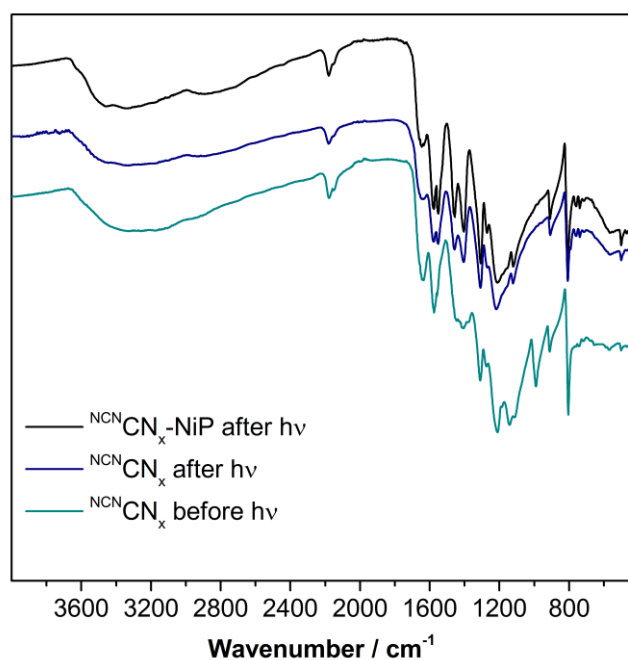

**Figure S15.** Comparing FTIR spectrum of <sup>NCN</sup>CN<sub>x</sub> (5 mg) before irradiation and after irradiation (1 sun irradiation, AM 1.5G, 25°C) for 24 h in the presence of 4-MBA (30 μmol) in KP<sub>i</sub> (0.02 M, pH 4.5, 3mL) with and without **NiP** (50 nmol).

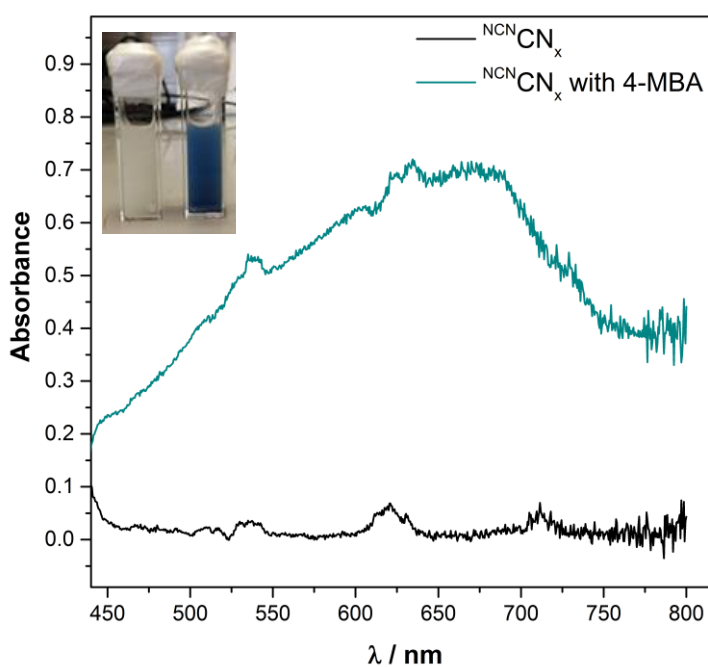

**Figure S16.** Colloidal suspensions of <sup>NCN</sup>CN<sub>x</sub> (5 mg) in KP<sub>i</sub> (3 mL) and <sup>NCN</sup>CN<sub>x</sub> (5 mg) and 4-MBA (30 μmol) in KP<sub>i</sub> (3 mL) were prepared. UV/vis spectra were recorded and the absorption spectra were generated by comparing samples before and after irradiation for 30 min (1 sun irradiation, AM 1.5G, 25°C). Inset: Solution of <sup>NCN</sup>CN<sub>x</sub> (5 mg), and 4-MBA (30 μmol) in an aqueous KP<sub>i</sub> solution (0.02 M, pH 4.5) before irradiation (pale yellow) and after irradiation (blue).

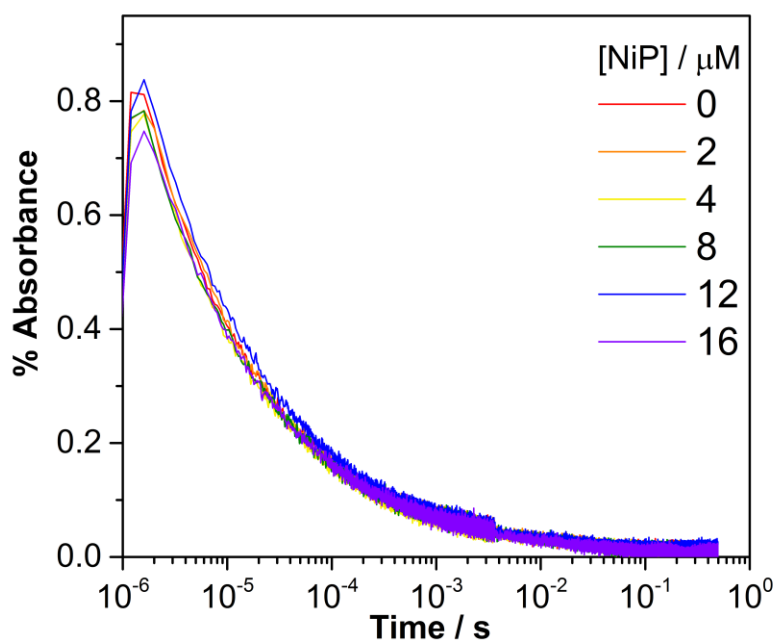

**Figure S17.** Transient decays probed at  $\lambda = 750$  nm of  $\text{NCCN}_x$  ( $5 \text{ mg mL}^{-1}$ ) suspension in aqueous  $\text{KPi}$  solution ( $0.02 \text{ M}$ ,  $\text{pH } 4.5$ ,  $25^\circ\text{C}$ ) with varying concentrations of **NiP** following  $\lambda = 355$  nm excitation.

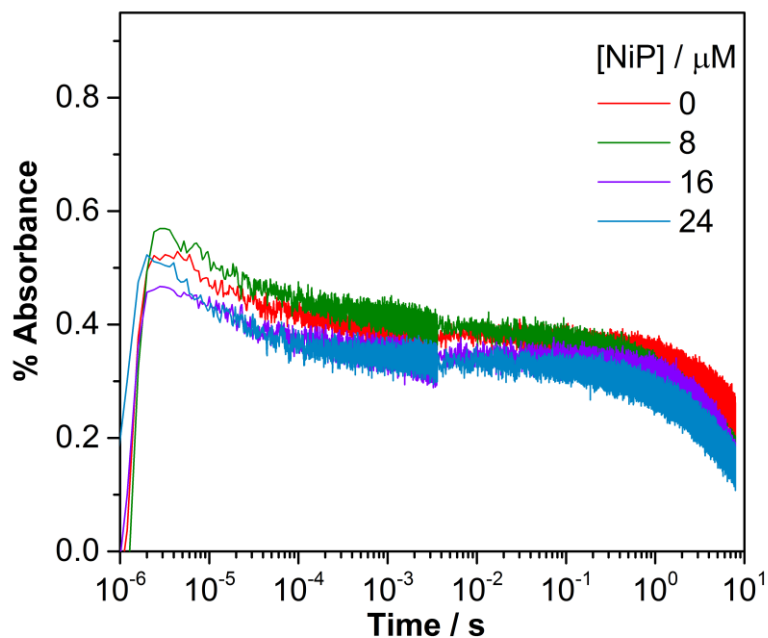

**Figure S18.** Transient decays probed at  $\lambda = 750$  nm of  $\text{NCCN}_x$  ( $1.2 \text{ mg mL}^{-1}$ ) suspension in aqueous  $\text{KPi}$  solution ( $0.02 \text{ M}$ ,  $\text{pH } 4.5$ ,  $25^\circ\text{C}$ ) in the presence 4-MBA ( $10 \text{ mM}$ ) with varying concentrations of **NiP** following  $\lambda = 355$  nm excitation. Note that changes in absorbance past  $\sim 2$  s are caused by settling of the heterogeneous dispersion.

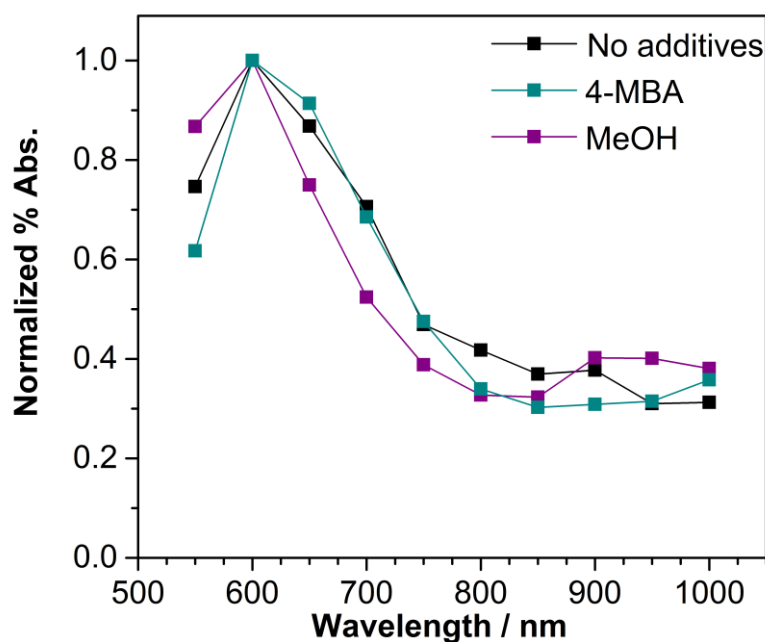

**Figure S19.** Normalized transient absorption spectra of  $\text{NCN CN}_x$  ( $1.2$  or  $5 \text{ mg mL}^{-1}$ ) suspension in aqueous  $\text{KPi}$  solution ( $0.02 \text{ M}$ ,  $\text{pH } 4.5$ ,  $25^\circ\text{C}$ , black line), spectra in the presence of 4-MBA ( $10 \text{ mM}$ ) and in a MeOH solution ( $20\%$  by volume) following  $\lambda = 355 \text{ nm}$  excitation are also shown. Spectra were taken at  $100 \mu\text{s}$  delay time.

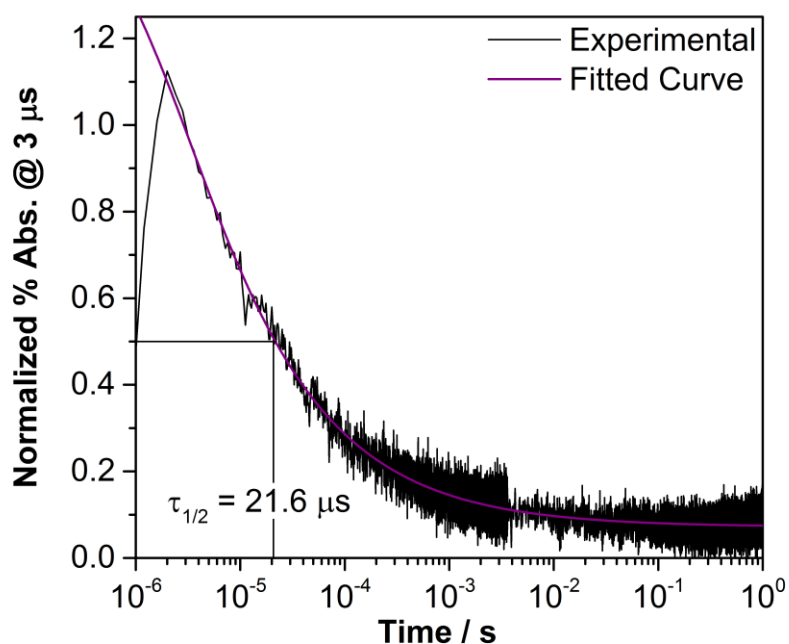

**Figure S20.** Normalized transient decay probed at  $\lambda = 750 \text{ nm}$  of  $\text{NCN CN}_x$  ( $1.2 \text{ mg mL}^{-1}$ ) suspension in aqueous  $\text{KPi}$  solution ( $0.02 \text{ M}$ ,  $\text{pH } 4.5$ ,  $25^\circ\text{C}$ ) following  $\lambda = 355 \text{ nm}$  excitation. A power law fit (purple line) is overlaid to the experimental data (black line).

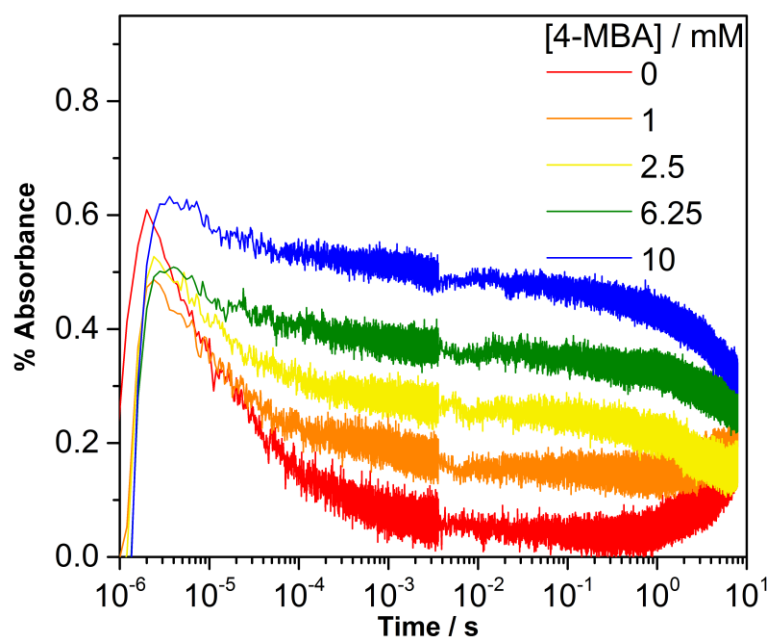

**Figure S21.** Transient decays probed at  $\lambda = 750$  nm of  ${}^{\text{NCN}}\text{CN}_x$  ( $1.2 \text{ mg mL}^{-1}$ ) suspension in aqueous KPi solution ( $0.02 \text{ M}$ ,  $\text{pH } 4.5$ ,  $25^\circ\text{C}$ ) in the presence of varying concentrations of 4-MBA following  $\lambda = 355$  nm excitation. Note that changes in absorbance past  $\sim 2$  s are caused by settling of the heterogeneous dispersion.

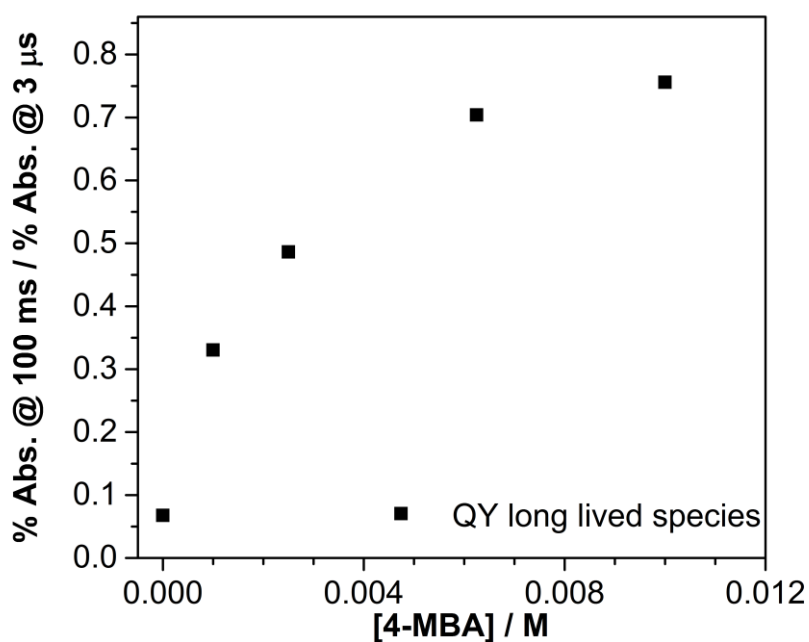

**Figure S22.** Yield of formation of the long-lived electron species versus 4-MBA concentration.

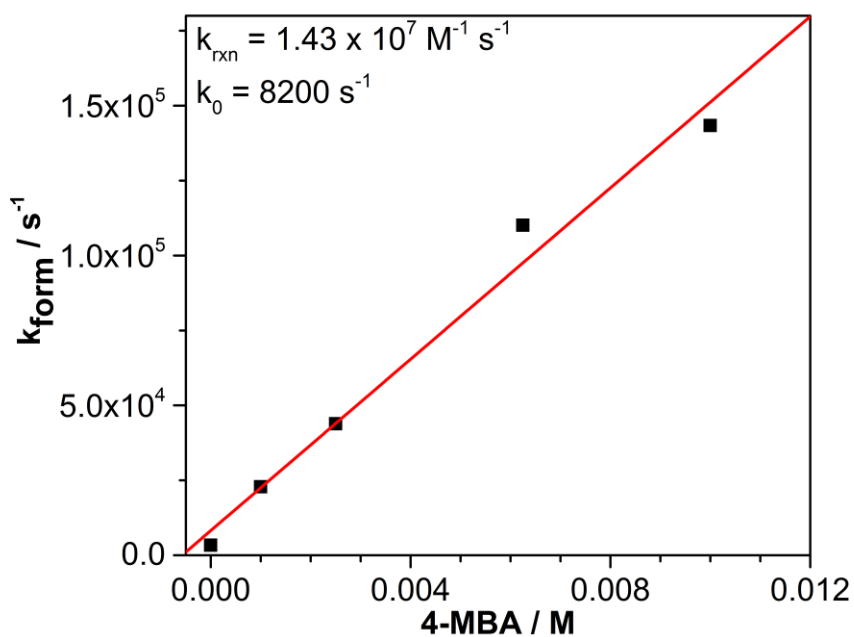

**Figure S23.** Rate of formation of the long-lived electron species versus 4-MBA concentration. The rate constant of reaction between  $^{\text{NCN}}\text{CN}_x$  and 4-MBA is obtained from the slope of the linear fit, whereas the background rate is taken from the intercept.

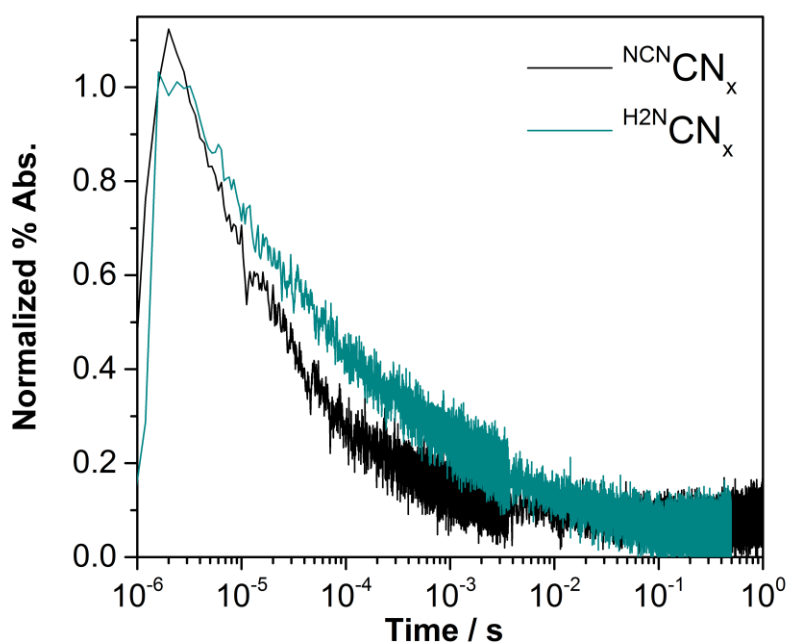

**Figure S24.** Normalized (at 3  $\mu\text{s}$ ) transient decays probed at  $\lambda = 750 \text{ nm}$  of  $^{\text{NCN}}\text{CN}_x$  (1.2  $\text{mg mL}^{-1}$ ) and  $^{\text{H2N}}\text{CN}_x$  (1.2  $\text{mg mL}^{-1}$ ) suspensions in aqueous  $\text{KP}_i$  solution (0.02 M, pH 4.5, 25°C) following  $\lambda = 355 \text{ nm}$  excitation.

## Supporting References

- (1) Lau, V. W.-h; Moudrakovski, I.; Botari, T.; Weinburger, S.; Mesch, M. B.; Duppel, V.; Senker, J.; Blum, V.; Lotsch, B. V. *Nat. Commun.* **2016**, *accepted*, arXiv:1604.02131v1 [cond – mat.mtrl – sci].
- (2) Thomas, A.; Fischer, A.; Goettmann, F.; Antonietti, M.; Müller, J.-O.; Schlögl, R.; Carlsson, J. *M. J. Mater. Chem.* **2008**, *18*, 4893–4908.

End of Supporting Information
